# Supplementary material for: Vanadium-doped graphitic carbon nitride for high performance lithium–sulfur batteries
Source: Royal Society of Chemistry journal article supplement (doi:10.1039/d3cc03422d), 2023-01-01
Supplement: d3cc03422d1.pdf [file d3cc03422d1.pdf]

# **Vanadium doped graphitic carbon nitride for high performance lithium-sulfur batteries**

Yankang Wang<sup>1,2,3,#</sup>, Yanbo Wang<sup>1,2,3,#</sup>, Chunhong Huang<sup>1,2</sup>, Qiang Zhang<sup>1,2</sup>,  
Zhanghaoran Liu<sup>1,2,3</sup> and Fengxiang Zhang<sup>1,2,3,\*</sup>

<sup>1</sup> State Key Laboratory of Fine Chemicals, Dalian University of Technology,  
Dalian 116023, PR China

<sup>2</sup> School of Chemical Engineering, Dalian University of Technology, Panjin  
124221, PR China

<sup>3</sup> Dalian Leicester Institute, Dalian University of Technology, Panjin 124221,  
PR China

# Equal contribution

\* Correspondence: zhangfx@dlut.edu.cn

## **1. Experimental section**

### **1.1 Preparation of g-C<sub>3</sub>N<sub>4</sub>**

60 g dicyandiamide was divided and loaded into three porcelain boats, which were heated in a tube furnace (Model: OTF-1200X) under air atmosphere at a rate of 5 °C/min from room temperature to 550 °C and held for 240 min. The yellow powder obtained after cooling to room temperature is the graphitic phase carbon nitride (g-C<sub>3</sub>N<sub>4</sub>).

### **1.2 Preparation of gC<sub>3</sub>N<sub>4</sub>-ND**

A gas flask containing acetonitrile, placed in a water bath at 60 °C, was connected to upstream of the tube furnace with argon as the carrier gas. 2 g graphitic phase carbon nitride (g-C<sub>3</sub>N<sub>4</sub>) was laid flat in a porcelain boat and placed in the tube furnace and heated from room temperature to 500 °C for 240 min at a rate of 5 °C per

minute. After cooling to room temperature, the reddish-brown powder obtained is  $\text{gC}_3\text{N}_4\text{-ND}$ .

### 1.3 Preparation of $\text{V@gC}_3\text{N}_4\text{-ND1}$

2 g of  $\text{gC}_3\text{N}_4\text{-ND}$  (2g) was mixed with 2 g of vanadium acetylacetonate and dispersed in 500 ml of ethanol. The mixture was then dried in a blast drying oven (Model: 2X24) until the ethanol in the solution had evaporated completely, resulting in a solid complex of  $\text{gC}_3\text{N}_4\text{-ND}$  and vanadium acetylacetonate. The solid complex was placed in a tube furnace and maintained in an argon atmosphere for 120 min at a heating rate of 5 °C/min up to 550 °C. The black solid obtained was  $\text{V@gC}_3\text{N}_4\text{-ND1}$ .  $\text{V@gC}_3\text{N}_4\text{-1}$  was prepared in exactly the same way as  $\text{V@gC}_3\text{N}_4\text{-ND1}$ , the only difference being that  $\text{g-C}_3\text{N}_4$  was the support rather than the  $\text{gC}_3\text{N}_4\text{-ND}$ .

### 1.4 Preparation of $\text{V@gC}_3\text{N}_4\text{-ND2}$

The dried solid complex was placed in a tube furnace under an argon atmosphere and heated to 170 °C for 30 minutes at a rate of 5 °C per minute, then to 550 °C for 120 minutes at the same rate. The black solid obtained was  $\text{V@gC}_3\text{N}_4\text{-ND2}$ .  $\text{V@gC}_3\text{N}_4\text{-2}$  was prepared in exactly the same way as  $\text{V@gC}_3\text{N}_4\text{-ND2}$ . The only difference is that  $\text{g-C}_3\text{N}_4$  is the support rather than the  $\text{gC}_3\text{N}_4\text{-ND}$ .

### 1.5 Battery assembly

The prepared catalyst was mixed with the conductive carbon black and the binder polyvinylidene fluoride (PVDF) in a mass ratio of 8:1:1 and dispersed in isopropanol, which was then poured onto a PP separator (Celgard 2325) in a typical filtration process with a controlled surface loading of 0.4 mg  $\text{cm}^{-2}$ . The pre-dried commercial sulphur and BP2000 conductive carbon black (3:1 by mass) were ground and encapsulated in ampoules and kept at 155 °C for 12 h to prepare the carbon and sulphur composite ( $\text{S@BP2000}$ ). Next,  $\text{S@BP2000}$ , Super P and PVDF were mixed

in a 7:2:1 mass ratio and dispersed in N-methyl-pyrrolidone (NMP). The resulting slurry was coated onto a clean aluminium foil and dried at 85 °C for 12 h to obtain a cathode. The coating thickness was controlled so that the surface loading of sulphur was approximately 1.2 g cm<sup>-2</sup>. The batteries were assembled in a glove box filled with argon gas (water <0.01 ppm, oxygen <0.01 ppm) using LIR 2016 cases. The cathode, 25 µl electrolyte, modified separator, 15 µl electrolyte, and lithium tabs were placed in the positive case and sealed with the negative case before being encapsulated by a sealer for 3 s at approx. 1 MPa. The high sulphur loading battery was made with 0.2 M Li<sub>2</sub>S<sub>8</sub> as active material on GDS 3250 carbon paper, the rest of the battery assembly conditions remaining unchanged.

## **1.6 Characterization methods**

The morphology of the prepared samples was characterized by scanning electron microscopy (SEM, Nova Nano SEM 450, USA). Powder X-ray diffraction (XRD, S17 Lab XRD-7000 s, Japan) was used to analyse the crystal structure of the samples in the range of 5-80°. X-ray photoelectron spectroscopy (XPS, ESCALAB250Xi, UK) was used to investigate the valence states of the different elements.

## **1.7 Electrochemical tests**

Cyclic voltammetry (CV) was tested at 1.7-2.8 V with a sweep rate of 0.1 mV s<sup>-1</sup>. Electrochemical impedance spectroscopy (EIS) was tested at a frequency of 0.01-10<sup>5</sup> Hz using the battery open circuit voltage as the starting voltage. The battery was assembled using GDS 3250 carbon paper as the working electrode and a lithium sheet as the reference electrode, with the counter electrodes separated by a PP separator. 20 µl of 0.2 M Li<sub>2</sub>S<sub>8</sub> was added dropwise to the working electrode side and 20 µl of electrolyte to the counter electrode side. The batteries were first discharged at 0.112 mA to a voltage of 2.1 V with open circuit voltage as the starting voltage, then discharged at 2.05 V and the response current versus time was recorded and a Li<sub>2</sub>S

deposition curve was obtained. The test platforms were LAND 3002A and CHE 760e respectively.

**Figure S1.** SEM images of (a)  $\text{gC}_3\text{N}_4\text{-ND}$ . (b)  $\text{g-C}_3\text{N}_4$ . (c)  $\text{V@gC}_3\text{N}_4\text{-1}$ . (d)  $\text{V@gC}_3\text{N}_4\text{-2}$ . (e)  $\text{V@gC}_3\text{N}_4\text{-ND1}$ . (f)  $\text{V@gC}_3\text{N}_4\text{-ND2}$ .

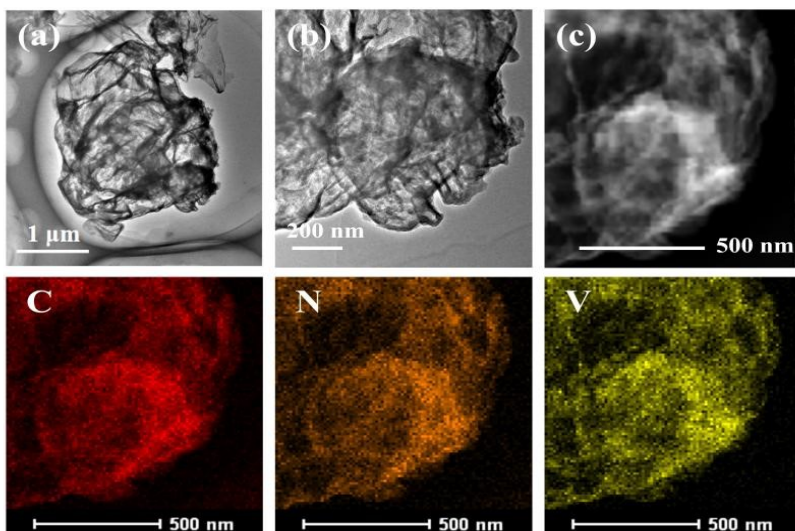

**Figure S2.** (a,b) High-resolution TEM image and (c) STEM image of  $\text{V@gC}_3\text{N}_4\text{-ND2}$  and the corresponding elemental mapping of C, N, and V.

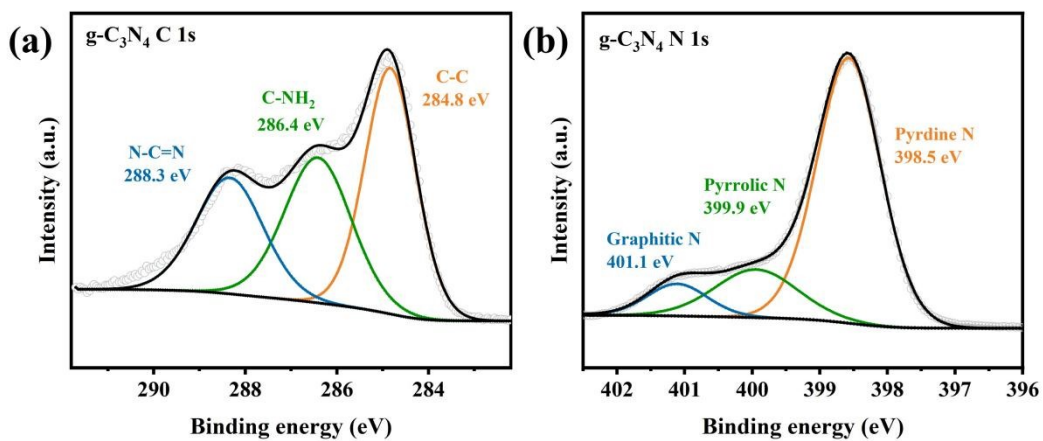

**Figure S3.** High-resolution (a) C 1s and (b) N 1s XPS spectra of  $\text{g-C}_3\text{N}_4$ .

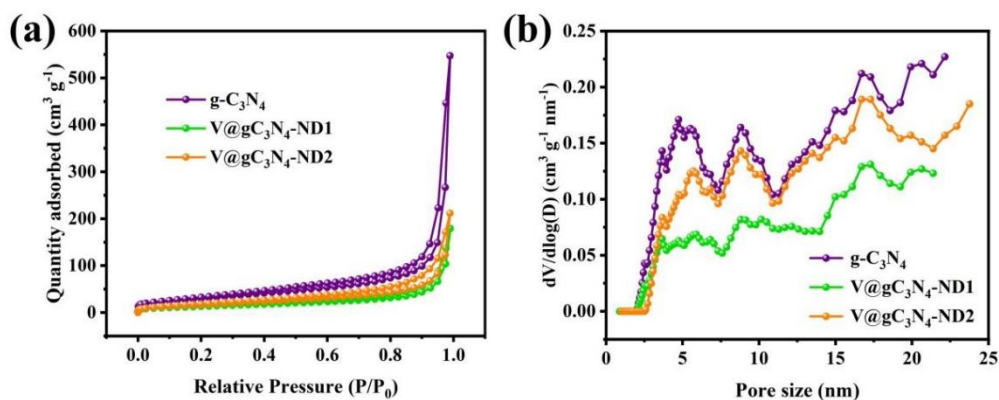

**Figure S4.** (a)  $\text{N}_2$  adsorption/desorption isotherms and (b) pore size distributions of different catalysts.

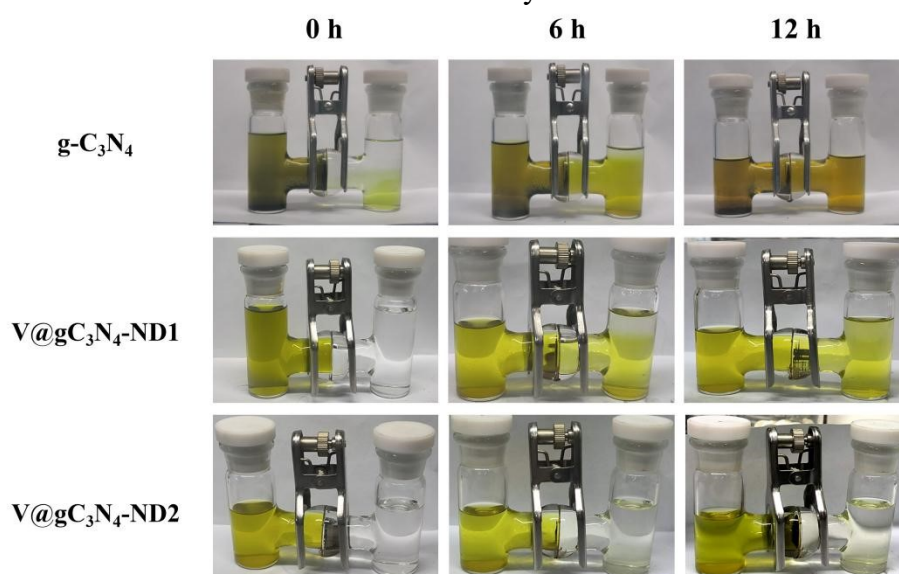

**Figure S5.** Polysulfide diffusion tests of the  $\text{g-C}_3\text{N}_4/\text{PP}$ ,  $\text{V@gC}_3\text{N}_4\text{-ND1}/\text{PP}$  and  $\text{V@gC}_3\text{N}_4\text{-ND2}/\text{PP}$  separators.

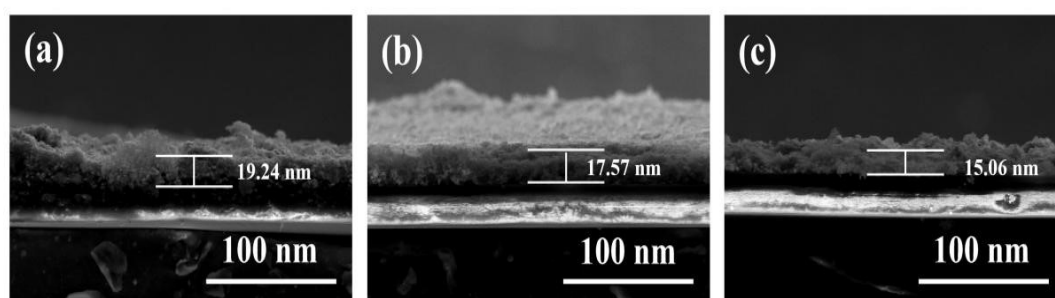

**Figure S6.** Cross-sectional SEM images of the  $\text{g-C}_3\text{N}_4$ ,  $\text{V@gC}_3\text{N}_4\text{-ND1}$  and  $\text{V@gC}_3\text{N}_4\text{-ND2}$  modified separators.

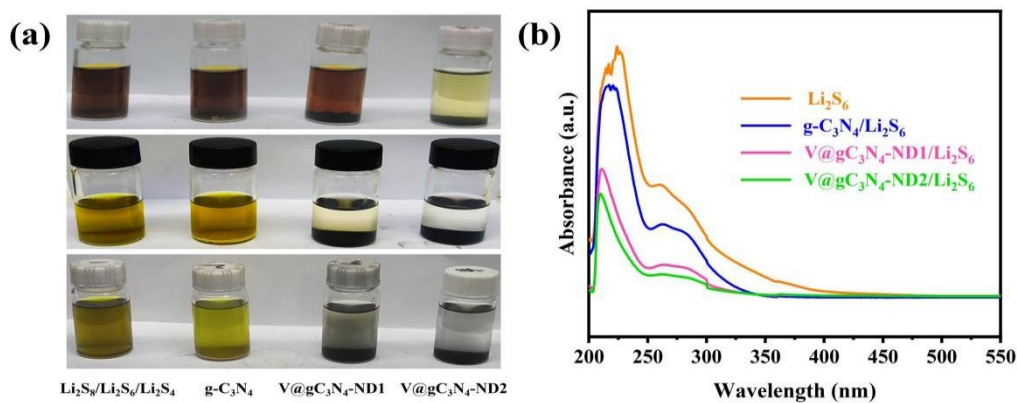

**Figure S7.** (a) Photographs and (b) UV-vis spectra of different samples soaked in the  $\text{Li}_2\text{S}_6$  solution.

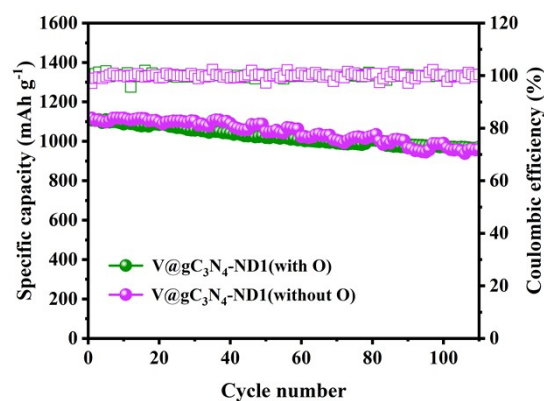

**Figure S8.** Cycle performances of the batteries assembled with oxygen-containing and oxygen-free  $\text{V@gC}_3\text{N}_4\text{-ND1}$ /PP separators at 0.5C.

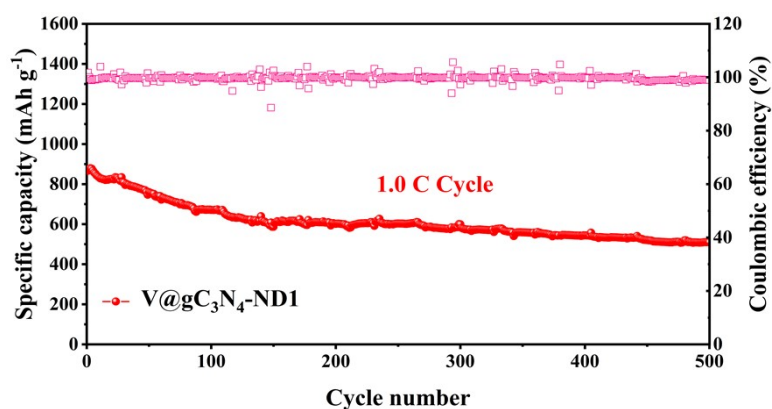

**Figure S9.** Cycle performance of the battery assembled with  $\text{V@gC}_3\text{N}_4\text{-ND1}$ /PP separator at 1C.

**Table S1.** Atomic percentage for several samples by EDS

| Element | g-C <sub>3</sub> N <sub>4</sub> | gC <sub>3</sub> N <sub>4</sub> -ND | V@gC <sub>3</sub> N <sub>4</sub> -1 | V@gC <sub>3</sub> N <sub>4</sub> -2 | V@gC <sub>3</sub> N <sub>4</sub> -ND1 | V@gC <sub>3</sub> N <sub>4</sub> -ND2 |
|---------|---------------------------------|------------------------------------|-------------------------------------|-------------------------------------|---------------------------------------|---------------------------------------|
| C       | 38.55                           | 37.2                               | 41.82                               | 38.88                               | 40.14                                 | 40.91                                 |
| N       | 61.45                           | 62.8                               | 46.98                               | 42.4                                | 40.67                                 | 43.76                                 |
| O       | -                               | -                                  | 8.6                                 | 15.57                               | 15.96                                 | 11.87                                 |
| V       | -                               | -                                  | 2.6                                 | 3.15                                | 3.23                                  | 3.46                                  |
